# Supplementary material
Source: Springer Nature journal article supplement (https://www.springermedizin.de/resource/supplementary/13063_2013_1934_MOESM2_ESM.pdf/9621986)
Supplement: MOESM2 [file 9621986]

## Existing scope and knowledge

### *Phase 1 – Identification of PROMs*

Systematic search for oesophageal cancer studies

List validated PROMs used in studies and other disease specific measures known to authors

Obtain copy of PROM and/or development paper describing PROM contents and scales

## Current diversity

### *Phase 2 – PROM content analysis*

List verbatim scales / single items  
Examine scale component items  
Compare scales with similar names

## Framework to inform core outcome set

### *Phase 3 – Categorisation into health domains*

Categorise all individual items into conceptual health domains
